# Supplementary material for: The development and experimental validation of hypoxia-related long noncoding RNAs prognostic signature in predicting prognosis and immunotherapy of cutaneous melanoma
Source: publisher site journal article supplement (doi:10.18632/aging.205157), 2023-11-02
Supplement: Supplementary file [file aging-v15i21-205157-supplementary-material-SD4.pdf]

**Supplementary Table 3. The gene list of prognostic related HRLs for CM.**

| <b>id</b>  | <b>HR</b>         | <b>HR.95L</b>     | <b>HR.95H</b>     | <b>pvalue</b>         |
|------------|-------------------|-------------------|-------------------|-----------------------|
| ITGB2-AS1  | 0.671137140464625 | 0.513574621252859 | 0.877039173415981 | 0.00348900951483177   |
| AC012236.1 | 0.621561580041301 | 0.460708278308383 | 0.838575766864853 | 0.00185714885662621   |
| AC004847.1 | 0.662287419087852 | 0.473141617674038 | 0.92704722877333  | 0.0163309211976843    |
| AL590764.1 | 0.478280985133198 | 0.315412163019371 | 0.7252500935607   | 0.000516003678495533  |
| LINC01094  | 0.600491868719888 | 0.405236014858999 | 0.889828325165448 | 0.011031853462136     |
| U62317.1   | 0.553860169394149 | 0.384226457710112 | 0.798386162862209 | 0.00154133262224601   |
| AC055822.1 | 0.667031249640888 | 0.462789518326508 | 0.961410469291519 | 0.0299343132308147    |
| LINC00324  | 0.442066737936786 | 0.300795679698848 | 0.649686860481925 | 0.0000324883045091025 |
| AC011899.2 | 0.455762248212926 | 0.285616293583148 | 0.727266726593907 | 0.000982103145414571  |
| EBLN3P     | 0.634490589736191 | 0.493168859030723 | 0.816309264244723 | 0.000402085735652504  |
| LINC01943  | 0.487285682248631 | 0.332817139628501 | 0.713446838674111 | 0.000219248905195166  |
| AC138207.5 | 0.738604530517063 | 0.593008281862057 | 0.919947780134428 | 0.00683415200776554   |
| C5orf56    | 0.336688023105576 | 0.206142605416507 | 0.549904881010416 | 0.000013670350622382  |
| LINC01857  | 0.742018308421827 | 0.605420167118429 | 0.909436454113837 | 0.00404691568564592   |
| MIR205HG   | 1.30540847451519  | 1.0739512719983   | 1.58674916615657  | 0.00744119756070963   |
| MIAT       | 0.547092787681263 | 0.380303775215042 | 0.787030100249755 | 0.00115103759627039   |
| DBH-AS1    | 0.666095220817949 | 0.492272085045144 | 0.90129596350324  | 0.00845060687864858   |
| AC018755.4 | 0.61289198876965  | 0.458022849572396 | 0.82012631083516  | 0.000986632410538008  |
| LINC01871  | 0.716674355992356 | 0.613404340402243 | 0.837330450254474 | 0.0000271330719455452 |
| TRBV11-2   | 0.660828968423209 | 0.5020173421791   | 0.869880159142963 | 0.0031369323223515    |
| AL662844.4 | 0.606510655416521 | 0.392130500569982 | 0.938093758580576 | 0.0246300771922071    |
| AC010542.5 | 0.735848918132354 | 0.545106252832363 | 0.99333593680694  | 0.0451085274951982    |
| TFAP2A-AS1 | 1.30264568131898  | 1.11421479512221  | 1.52294313312621  | 0.000911217800086538  |
| AL365361.1 | 0.630505868341994 | 0.478687184726926 | 0.83047481256569  | 0.00103219257377634   |
| CARD8-AS1  | 0.726393086145709 | 0.5499712605248   | 0.959408160886062 | 0.0243298766170962    |
| AC016957.2 | 0.615179444574919 | 0.400571364043521 | 0.944764860891026 | 0.0264500470048086    |
| AC004687.1 | 0.70966160562014  | 0.564858576033377 | 0.891585284989277 | 0.0032242365942918    |
| AC136475.3 | 0.6925935812453   | 0.541465776739557 | 0.885902469534869 | 0.0034495169559226    |
| AP002954.1 | 0.538303946502239 | 0.373725163621561 | 0.775358918869353 | 0.000879271794920248  |
| AL359076.1 | 0.624213918049454 | 0.460422331989397 | 0.846273059352005 | 0.0024064630659777    |
| AC022706.1 | 0.539641405254255 | 0.364428479141049 | 0.799094645268039 | 0.00207221939928619   |
| UBR5-AS1   | 0.683390210799788 | 0.468035469825118 | 0.997835015349333 | 0.0487025705539239    |
| AC004918.1 | 0.694363600716074 | 0.497821932088729 | 0.96850053989477  | 0.0316752263018593    |
| PSMB8-AS1  | 0.73508994231721  | 0.63018619297253  | 0.857456461791243 | 0.0000894811274321151 |
| AC004585.1 | 0.7595671587066   | 0.603620564909099 | 0.955802870421588 | 0.0190015574082953    |
| TRG-AS1    | 0.637950864392539 | 0.463991469927423 | 0.877131007263663 | 0.00565786553116376   |
| AL133371.2 | 0.543516552700713 | 0.384993343493816 | 0.767312599170723 | 0.000529487227457248  |
| AC090559.1 | 0.628246825066334 | 0.457011866855783 | 0.863640753841694 | 0.00419816885495861   |
| LINC00861  | 0.654209349170864 | 0.467383602976832 | 0.915714350731685 | 0.0133923767610554    |
| LINC02560  | 1.34969854740399  | 1.06152276516128  | 1.71610654867837  | 0.014397795867481     |
| AC242842.1 | 0.590066991169284 | 0.443020760890873 | 0.78592040103813  | 0.000309415122333841  |
| AC008105.3 | 0.629036739031298 | 0.439050643172713 | 0.901233662230337 | 0.0115108799395445    |
| PCED1B-AS1 | 0.70001944776536  | 0.578559643564831 | 0.846977891908232 | 0.000244366116422486  |
| AC015911.3 | 0.477123009615193 | 0.333467722195641 | 0.682663871649632 | 0.0000515169054696285 |

---

|            |                   |                   |                   |                      |
|------------|-------------------|-------------------|-------------------|----------------------|
| THCAT158   | 0.825451467984621 | 0.719369436125531 | 0.947176918813473 | 0.0062717765541732   |
| AC098613.1 | 0.465653646578532 | 0.304498458558468 | 0.712099889104198 | 0.000420891226271034 |
| AC015819.1 | 0.658427754108841 | 0.450677607142769 | 0.961945081161922 | 0.0307301477891111   |
| LINC00239  | 0.650766834007573 | 0.477411523910338 | 0.887070066460684 | 0.00656481822821938  |
| USP30-AS1  | 0.575066411137741 | 0.457935399701657 | 0.72215726810876  | 1.92486188700598E-06 |
| AC243960.1 | 0.624651871984579 | 0.479251440969056 | 0.814165441808304 | 0.000500075355889725 |
| LINC01711  | 0.851963918614458 | 0.73244369507368  | 0.990987462248395 | 0.0377689440282985   |

---
