# Supplementary material for: The development and experimental validation of hypoxia-related long noncoding RNAs prognostic signature in predicting prognosis and immunotherapy of cutaneous melanoma
Source: Aging (Albany NY). 2023 Nov 2;15(21):11918–39. doi: 10.18632/aging.205157 (PMC10683585; doi:10.18632/aging.205157)
Supplement: Supplementary Table 2 [file aging-15-205157-s003.xlsx]

## Sheet: Sheet1
Supplementary Table 2. The gene list of HRLs.
AL117379.1
FGD5-AS1
ITGB2-AS1
AC127024.5
AC008764.2
HAS2-AS1
AL139287.1
AC004656.1
AL135999.1
AL162586.1
AL355312.3
U62631.1
AC012236.1
AC011462.4
AC009120.2
AC004847.1
AL590764.1
TNFRSF10A-AS1
LINC01094
LINC01614
NEAT1
U62317.1
AP006621.2
AC055822.1
AC132872.3
AC097534.2
AC084824.4
RUSC1-AS1
LINC00324
LINC01215
SMIM25
AC011899.2
AL844908.1
AL512791.1
ARHGAP5-AS1
AL109811.3
AC010883.1
EBLN3P
AL365330.1
PSMA3-AS1
LINC01943
AP003392.1
AC008735.2
AL049840.1
AC008610.1
AL139089.1
AC090948.3
LINC01637
AC012360.3
SH3BP5-AS1
THUMPD3-AS1
AL354836.1
LINC01503
ANKRD10-IT1
LINC01235
AC138207.5
C5orf56
LINC01857
AC004253.1
MIR205HG
AL021707.8
AC009414.2
AL159166.1
MIAT
AC112721.2
AC090589.3
DBH-AS1
ATP2B1-AS1
AL513320.1
AC025470.2
AC010503.4
PSPC1-AS2
LINC01945
AC018755.4
LINC01871
AL031058.1
LINC01355
MRPS30-DT
AC098484.1
SH3PXD2A-AS1
AL390728.6
TRBV11-2
AC015849.3
AL928654.2
LINC02575
AC115522.1
AL662844.4
AC010542.5
TFAP2A-AS1
LINC01176
AC103706.1
SNHG12
INE1
AL365361.1
LINC01089
AL450384.2
AC145098.1
CARD8-AS1
AC024060.1
AC025259.3
AC016957.2
AL139393.2
LINC02154
AC008115.3
PTOV1-AS2
AC004687.1
AC136475.3
AC004148.2
LENG8-AS1
TNRC6C-AS1
AP002954.1
MIR600HG
AL357033.3
AP001542.3
AC127502.2
AL359076.1
AL513165.1
AC004908.1
AC003102.1
AC026401.3
AC022706.1
SLC25A25-AS1
AP002807.1
UBR5-AS1
AC004918.1
PSMB8-AS1
LINC00926
AC087481.3
AC004585.1
LINC00973
TMEM147-AS1
AC005288.1
AC073046.1
AC011478.1
TRG-AS1
AL133371.2
AC090559.1
OIP5-AS1
LINC00861
LINC02560
AC242842.1
LINC00106
AC008105.3
PCED1B-AS1
AC021078.1
AC084018.1
CCDC18-AS1
AC027796.4
AC093788.1
AC005104.1
AC015911.3
LINC00342
THCAT158
AL355488.1
AC010761.1
AC098613.1
LINC02361
AC104083.1
AL022328.2
AC015819.1
LINC00239
AC112721.1
AL354733.3
AC007566.1
AL132989.1
AC020558.2
AL357033.4
USP30-AS1
AC011477.3
AC093278.2
RAD51-AS1
AC010834.3
AC243960.1
IER3-AS1
AC007038.2
AC002553.2
LINC01711
LINC02587
AC116914.2
SOS1-IT1
LINC00941
AC127024.4
AC011477.2
AC024075.1
AC004908.2
Z83843.1
